# Supplementary material for: Projecting the incidence and costs of major cardiovascular and kidney complications of type 2 diabetes with widespread SGLT2i and GLP-1 RA use: a cost-effectiveness analysis
Source: PubMed Central journal article supplement (PMC9947091; doi:10.1007/s00125-022-05832-0), 2022-11-21
Supplement: 125_2022_5832_MOESM1_ESM.pdf [file 125_2022_5832_MOESM1_ESM.pdf]

# **Projecting the incidence and costs of major cardiovascular and kidney complications of type 2 diabetes with widespread SGLT2i and GLP-1 RA use: A cost-effectiveness analysis**

## **Electronic Supplementary Material**

### **ESM Methods**

#### **Diabetes incidence in the model.**

Age-specific diabetes incidence rates were modelled using the National Diabetes Services Scheme population. All incident cases of type 2 diabetes from 2017-2019 were included as the numerator. The denominator was all people without diabetes in Victoria, New South Wales, Queensland, and the Australian Capital Territory, derived from (1). This data was tabulated into incident cases per population by single year of age and calendar year. A Poisson model was then used to analyse the incidence of diabetes, with spline effects of age and a linear effect of calendar time, using log-population size as the offset. Models were fit for men and women separately. These models were then used to predict the incidence of type 2 diabetes at each single year of age, with the prediction year set at 2019. The age-specific incidence of type 2 diabetes by sex is shown in ESM Fig. 1. The proportion of people with incident type 2 diabetes and prior myocardial infarction, stroke, heart failure, and end-stage kidney disease was estimated using a lookback period from 30 June 2019 to 1 July 2010. Both diabetes incidence and the proportion of incident cases with prior myocardial infarction, stroke, heart failure, and end-stage kidney disease was assumed to remain constant from 2020-2040. The number of incident cases of type 2 diabetes from 2020-2040 was estimated using these incidence rates and the Australian Bureau of Statistics Australian Population Projections, medium series (2).

#### **References**

1. The Australian Bureau of Statistics. National, state, and territory population. Available at: <https://www.abs.gov.au/statistics/people/population/national-state-and-territory-population/jun-2020> [Accessed 3.11.2021].
2. The Australian Bureau of Statistics. Population Projections, Australia. Available at: <https://www.abs.gov.au/statistics/people/population/population-projections-australia/2017-base-2066> [Accessed 3.11.2021].

### **Transition probabilities for the model.**

We used a linked dataset derived from the National Diabetes Services Scheme (NDSS) to estimate the incidence of hospitalization for myocardial infarction (MI), stroke, and heart failure (HF), the incidence of end-stage kidney disease (ESKD), and all-cause mortality. MI, stroke, and HF admission was defined from hospital admissions data when one of the following International Classification of Diseases (ICD)-10 codes was listed as the primary diagnosis for an admission: MI (ICD-10 codes: I21-I22), stroke (I60-I64), and HF (I110, I130, I132, or I50). We included admissions to public hospitals only. ESKD was defined from the Australia and New Zealand Dialysis and Transplant Registry as initiation of kidney replacement therapy (receipt of dialysis or a kidney transplant). All-cause mortality was derived from the National Death Index.

Incidence rates were estimated for the period covering 1 July 2016 to 31 May 2019. We included a look-back period from 1 July 2010 to 30 June 2016 to split the NDSS population into their appropriate health state (i.e., whether they had had a prior admission for MI, stroke, or HF, or developed ESKD). This was used to split subsequent follow-up time by the presence or absence of prior MI, stroke, HF, and/or ESKD. If an individual experienced any of these outcomes during follow-up, their risk time was split into periods representing time before and after this event. This way, we could estimate the effect of each prior event on subsequent events. To partition follow-up time, individuals were followed from 1 July 2016, date of NDSS registration, or migration into one of the four states in this study, until an event (MI, stroke, HF, ESKD, or death), migration out of one of the four states, or end of follow-up. Except for death, once an event occurred, individuals were followed subsequently until another event, migration out, or end of follow-up. Because admissions are only recorded in hospital admitted datasets at discharge, we terminated follow-up on 31 May 2019 to avoid underestimating admission rates.

Follow-up time was then split into 6-month intervals by attained age (10-100 years), duration of diabetes (0-50 years), and calendar time, and event counts and risk time were then tabulated in these intervals, with each tabulation assigned the midpoint of the interval. Age at diagnosis of diabetes was added to the tabulation as attained age minus duration of diabetes. Incidence and mortality rates were then analyzed via a Poisson model (one for each outcome) with spline effects of attained age, duration of diabetes, age at diagnosis of diabetes, a linear effect of calendar time, and binary effects of prior MI, stroke, HF, and ESKD, using log-person-time as the offset. Models were fit for men and women separately. The models were then used to predict the incidence of each complication by any combination of age, duration of diabetes, and prior MI, stroke, HF, and ESKD, with the prediction year set at 2019; however, the effect of calendar time was partially carried forward from 2020-2040. While the use of SGLT2is and GLP-1 RAs was relatively low during the estimation period, we nevertheless corrected these incidence rates for use of SGLT2is and GLP-1 RAs during the estimation period.

Examples of these incidence rates are shown in ESM Fig. 2-3. While the examples only show selected rates, we included predicted incidence rates for all possible sex, age, and duration of diabetes combinations in all health states for the model.

## **Validation of transition probabilities and model structure**

We validated the transition probabilities and model structure using two tests. First, we compared the actual vs. predicted number of events using the actual population structure among people with type 2 diabetes. Events were predicted using the transition probabilities described above and actual demographic structure of the population with type 2 diabetes for three financial years (we selected 3 so that the first 6 years could be used to define prior events). This test (ESM Fig. 4-8) demonstrated that the modelled transition probabilities could recapitulate reality reasonably well in the absence of any other model inputs.

Second, we compared the actual vs. predicted number of events using the actual population structure in the first year, then a modelled population structure in the second 2 years. I.e., we tested our full model over the years financial years 2016-17 to 2018-19 to see if the model could recapitulate reality for years in which we had data. This test (ESM Fig. 9) demonstrated that our full model could recapitulate reality reasonably well.

ESM Table 1 – Characteristics of the National Diabetes Services Scheme population.

|                              |       |                   |
|------------------------------|-------|-------------------|
| Number                       |       | 951,300           |
| Male                         |       | 519,094 (54.6%)   |
| Age at diagnosis of diabetes |       | 57.0 (47.8, 65.8) |
| Duration of diabetes         |       | 10.2 (5.3, 16.6)  |
| Age                          |       | 68.9 (59.0, 77.6) |
| Age group                    | 0-19  | 371 (0.0%)        |
|                              | 20-39 | 26,482 (2.8%)     |
|                              | 40-59 | 238,773 (25.1%)   |
|                              | 60-79 | 545,658 (57.4%)   |
|                              | 80+   | 206,727 (21.7%)   |
| Prior MI                     |       | 29,831            |
| Prior stroke                 |       | 17,299            |
| Prior HHF                    |       | 21,106            |
| Prior ESKD                   |       | 5929              |
| MI during follow-up          |       | 21,006            |
| Stroke during follow-up      |       | 15,036            |
| HHF during follow-up         |       | 35,177            |
| ESKD during follow-up        |       | 2609              |

Prior refers to the period between 1 July 2010 and 30 June 2016. Follow-up is the period from 1 July 2016 to 30 June 2019.

Abbreviations: MI – myocardial infarction; HHF – hospitalisation for heart failure; ESKD – end-stage kidney disease.

ESM Table 2 – Results from the base-case analysis, males only.

| <b>Total population</b>             |                   |                   |                           |                   |                           |
|-------------------------------------|-------------------|-------------------|---------------------------|-------------------|---------------------------|
|                                     | Current use       | SGLT2i use        |                           | GLP-1 RA use      |                           |
|                                     |                   | Absolute value    | Difference to current use | Absolute value    | Difference to current use |
| Myocardial infarctions              | 196,630           | 187,774           | -8856 (-4.5%)             | 185,665           | -10,965 (-5.6%)           |
| Strokes                             | 118,623           | 119,567           | 944 (0.8%)                | 105,664           | -12,959 (-10.9%)          |
| Hospitalisations for heart failure  | 278,492           | 212,364           | -66,128 (-23.7%)          | 257,596           | -20,896 (-7.5%)           |
| End-stage kidney disease            | 23,771            | 19,147            | -4625 (-19.5%)            | 23,941            | 170 (0.7%)                |
| Deaths                              | 611,293           | 590,012           | -21,281 (-3.5%)           | 587,867           | -23,426 (-3.8%)           |
| Years of life lived                 | 1,4911,252        | 15,144,833        | 233,580 (1.6%)            | 15,177,918        | 266,665 (1.8%)            |
| Quality-adjusted life years         | 7,206,180         | 7,308,752         | 102,572 (1.4%)            | 7,322,676         | 116,495 (1.6%)            |
| Acute healthcare costs              | \$7,643,904,768   | \$7,037,588,208   | -\$606,316,560            | \$7,163,171,616   | -\$480,733,152            |
| Chronic healthcare costs            | \$49,898,797,184  | \$48,835,062,912  | -\$1,063,734,272          | \$50,327,847,040  | \$429,049,856             |
| SGLT2i costs                        | \$1,335,076,076   | \$5,081,731,040   | \$3,746,654,964           | \$1,356,149,312   | \$21,073,236              |
| GLP-1 RA costs                      | \$787,860,842     | \$799,694,136     | \$11,833,294              | \$12,004,450,080  | \$11,216,589,238          |
| Total healthcare costs              | \$59,665,638,870  | \$61,754,076,296  | 2,088,437,426 (3.5%)      | \$70,851,618,048  | 11,185,979,178 (18.7%)    |
| Acute absenteeism costs             | \$462,392,554     | \$441,859,997     | -\$20,532,557             | \$420,868,149     | -\$41,524,405             |
| Chronic absenteeism costs           | \$2,850,596,336   | \$2,852,373,376   | \$1,777,040               | \$2,854,723,280   | \$4,126,944               |
| Non-participation costs - morbidity | \$34,617,438,464  | \$34,575,720,576  | -\$41,717,888             | \$34,638,219,520  | \$20,781,056              |
| Non-participation costs - mortality | \$10,608,157,176  | \$9,871,775,784   | -\$736,381,392            | \$9,758,685,208   | -\$849,471,968            |
| Total productivity costs            | \$48,538,584,530  | \$47,741,729,733  | -\$796,854,797            | \$47,672,496,157  | -\$866,088,373            |
| Total societal costs                | \$108,204,223,400 | \$109,495,806,029 | \$1,291,582,629           | \$118,524,114,205 | \$10,319,890,805          |
| ICER– years of life lived           | .                 | .                 | 8941                      | .                 | 41,948                    |
| ICER – QALYs                        | .                 | .                 | 20,361                    | .                 | 96,021                    |
| SICER – years of life lived         | .                 | .                 | 5530                      | .                 | 38,700                    |
| SICER – QALYs                       | .                 | .                 | 12,592                    | .                 | 88,586                    |

| <b>Secondary prevention population</b> |                  |                  |                           |                  |                           |
|----------------------------------------|------------------|------------------|---------------------------|------------------|---------------------------|
|                                        | Current use      | SGLT2i use       |                           | GLP-1 RA use     |                           |
|                                        |                  | Absolute value   | Difference to current use | Absolute value   | Difference to current use |
| Myocardial infarctions                 | 99,803           | 96,152           | -3651 (-3.7%)             | 95,547           | -4256 (-4.3%)             |
| Strokes                                | 53,576           | 54,255           | 679 (1.3%)                | 48,566           | -5010 (-9.4%)             |
| Hospitalisations for heart failure     | 197,226          | 158,309          | -38,918 (-19.7%)          | 186,530          | -10,697 (-5.4%)           |
| End-stage kidney disease               | 9105             | 7518             | -1587 (-17.4%)            | 9336             | 231 (2.5%)                |
| Deaths                                 | 210,514          | 205,987          | -4527 (-2.2%)             | 205,296          | -5218 (-2.5%)             |
| Years of life lived                    | 2,349,664        | 2,399,861        | 50,197 (2.1%)             | 2,410,608        | 60,944 (2.6%)             |
| Quality-adjusted life years            | 955,000          | 973,826          | 18,826 (2.0%)             | 977,735          | 22,734 (2.4%)             |
| Acute healthcare costs                 | \$3,547,367,392  | \$3,253,504,904  | -\$293,862,488            | \$3,368,592,112  | -\$178,775,280            |
| Chronic healthcare costs               | \$15,364,855,040 | \$15,248,132,800 | -\$116,722,240            | \$15,671,453,184 | \$306,598,144             |
| SGLT2i costs                           | \$199,053,025    | \$762,665,630    | \$563,612,605             | \$203,793,071    | \$4,740,046               |
| GLP-1 RA costs                         | \$117,466,029    | \$120,018,009    | \$2,551,980               | \$1,803,948,680  | \$1,686,482,652           |
| Total healthcare costs                 | \$19,228,741,486 | \$19,384,321,343 | 155,579,857 (0.8%)        | \$21,047,787,047 | 1,819,045,561 (9.5%)      |
| Acute absenteeism costs                | \$144,293,341    | \$137,761,989    | -\$6,531,352              | \$133,286,137    | -\$11,007,204             |
| Chronic absenteeism costs              | \$413,115,339    | \$415,330,826    | \$2,215,487               | \$415,484,060    | \$2,368,721               |
| Non-participation costs - morbidity    | \$6,185,578,112  | \$6,207,136,496  | \$21,558,384              | \$6,219,772,096  | \$34,193,984              |
| Non-participation costs - mortality    | \$2,020,059,186  | \$1,897,828,206  | -\$122,230,980            | \$1,882,322,811  | -\$137,736,375            |
| Total productivity costs               | \$8,763,045,978  | \$8,658,057,517  | -\$104,988,461            | \$8,650,865,104  | -\$112,180,874            |
| Total societal costs                   | \$27,991,787,463 | \$28,042,378,859 | \$50,591,396              | \$29,698,652,151 | \$1,706,864,688           |
| ICER– years of life lived              | .                | .                | 3099                      | .                | 29,848                    |
| ICER – QALYs                           | .                | .                | 8264                      | .                | 80,013                    |
| SICER – years of life lived            | .                | .                | 1008                      | .                | 28,007                    |
| SICER – QALYs                          | .                | .                | 2687                      | .                | 75,078                    |

All costs are presented in 2020 Australian dollars. All health economic outcomes have been subject to 5% annual discounting.

Abbreviations: SGLT2i – sodium-glucose co-transporter 2 inhibitor; GLP-1 RA – glucagon-like peptide 1 receptor agonist; ICER – incremental cost-effectiveness ratio; QALY – Quality Adjusted Life Year.

ESM Table 3 – Results from the base-case analysis, females only.

| Total population                    |                  |                  |                           |                  |                           |
|-------------------------------------|------------------|------------------|---------------------------|------------------|---------------------------|
|                                     | Current use      | SGLT2i use       |                           | GLP-1 RA use     |                           |
|                                     |                  | Absolute value   | Difference to current use | Absolute value   | Difference to current use |
| Myocardial infarctions              | 97,794           | 93,273           | -4520 (-4.6%)             | 92,304           | -5490 (-5.6%)             |
| Strokes                             | 68,852           | 69,271           | 419 (0.6%)                | 61,402           | -7450 (-10.8%)            |
| Hospitalisations for heart failure  | 214,204          | 163,092          | -51,113 (-23.9%)          | 198,000          | -16,204 (-7.6%)           |
| End-stage kidney disease            | 11,047           | 8801             | -2246 (-20.3%)            | 11,048           | 1 (0.0%)                  |
| Deaths                              | 444,426          | 429,718          | -14,708 (-3.3%)           | 427,935          | -16,491 (-3.7%)           |
| Years of life lived                 | 11,947,350       | 12,113,788       | 166,438 (1.4%)            | 12,140,713       | 193,362 (1.6%)            |
| Quality-adjusted life years         | 5,835,233        | 5,909,107        | 73,874 (1.3%)             | 5,919,669        | 84,436 (1.4%)             |
| Acute healthcare costs              | \$5,118,277,008  | \$4,678,827,264  | -\$439,449,744            | \$4,803,511,552  | -\$314,765,456            |
| Chronic healthcare costs            | \$34,711,532,800 | \$34,212,428,672 | -\$499,104,128            | \$34,988,147,072 | \$276,614,272             |
| SGLT2i costs                        | \$1,081,595,956  | \$4,108,260,240  | \$3,026,664,284           | \$1,096,943,020  | \$15,347,064              |
| GLP-1 RA costs                      | \$638,276,072    | \$646,502,470    | \$8,226,398               | \$9,709,990,976  | \$9,071,714,904           |
| Total healthcare costs              | \$41,549,681,836 | \$43,646,018,646 | 2,096,336,810 (5.0%)      | \$50,598,592,620 | 9,048,910,784 (21.8%)     |
| Acute absenteeism costs             | \$115,061,524    | \$110,500,494    | -\$4,561,030              | \$104,615,853    | -\$10,445,671             |
| Chronic absenteeism costs           | \$1,368,027,632  | \$1,370,519,868  | \$2,492,236               | \$1,371,393,408  | \$3,365,776               |
| Non-participation costs - morbidity | \$4,605,820,624  | \$4,450,168,304  | -\$155,652,320            | \$4,478,809,808  | -\$127,010,816            |
| Non-participation costs - mortality | \$3,112,705,054  | \$2,896,534,246  | -\$216,170,808            | \$2,858,574,480  | -\$254,130,574            |
| Total productivity costs            | \$9,201,614,834  | \$8,827,722,912  | -\$373,891,922            | \$8,813,393,549  | -\$388,221,285            |
| Total societal costs                | \$50,751,296,670 | \$52,473,741,558 | \$1,722,444,888           | \$59,411,986,169 | \$8,660,689,499           |
| ICER– years of life lived           | .                | .                | 12,595                    | .                | 46,798                    |
| ICER – QALYs                        | .                | .                | 28377                     | .                | 107,169                   |
| SICER – years of life lived         | .                | .                | 10,349                    | .                | 44,790                    |
| SICER – QALYs                       | .                | .                | 23,316                    | .                | 102,571                   |



| <b>Secondary prevention population</b> |                  |                  |                           |                  |                           |
|----------------------------------------|------------------|------------------|---------------------------|------------------|---------------------------|
|                                        | Current use      | SGLT2i use       |                           | GLP-1 RA use     |                           |
|                                        |                  | Absolute value   | Difference to current use | Absolute value   | Difference to current use |
| Myocardial infarctions                 | 46,914           | 45,163           | -1751 (-3.7%)             | 44,959           | -1955 (-4.2%)             |
| Strokes                                | 26,498           | 26,815           | 317 (1.2%)                | 24,041           | -2457 (-9.3%)             |
| Hospitalisations for heart failure     | 143,772          | 116,200          | -27,573 (-19.2%)          | 136,233          | -7540 (-5.2%)             |
| End-stage kidney disease               | 4110             | 3373             | -737 (-17.9%)             | 4192             | 82 (2.0%)                 |
| Deaths                                 | 135,247          | 132,774          | -2473 (-1.8%)             | 132,208          | -3039 (-2.2%)             |
| Years of life lived                    | 1,367,791        | 1,395,850        | 28,059 (2.1%)             | 1,403,874        | 36,083 (2.6%)             |
| Quality-adjusted life years            | 547,744          | 558,275          | 10,531 (1.9%)             | 561,099          | 13,355 (2.4%)             |
| Acute healthcare costs                 | \$2,178,266,312  | \$1,981,260,192  | -\$197,006,120            | \$2,074,286,616  | -\$103,979,696            |
| Chronic healthcare costs               | \$8,332,686,080  | \$8,304,237,600  | -\$28,448,480             | \$8,505,713,696  | \$173,027,616             |
| SGLT2i costs                           | \$116,417,871    | \$445,527,254    | \$329,109,384             | \$119,255,416    | \$2,837,546               |
| GLP-1 RA costs                         | \$68,701,016     | \$70,111,057     | \$1,410,041               | \$1,055,632,804  | \$986,931,788             |
| Total healthcare costs                 | \$10,696,071,278 | \$10,801,136,103 | 105,064,824 (1.0%)        | \$11,754,888,532 | 1,058,817,254 (9.9%)      |
| Acute absenteeism costs                | \$16,765,475     | \$15,974,083     | -\$791,391                | \$15,509,980     | -\$1,255,495              |
| Chronic absenteeism costs              | \$76,038,880     | \$76,338,993     | \$300,113                 | \$76,361,855     | \$322,975                 |
| Non-participation costs - morbidity    | \$2,941,035,696  | \$2,951,555,720  | \$10,520,024              | \$2,954,019,840  | \$12,984,144              |
| Non-participation costs - mortality    | \$388,699,466    | \$364,475,931    | -\$24,223,535             | \$361,615,040    | -\$27,084,427             |
| Total productivity costs               | \$3,422,539,517  | \$3,408,344,727  | -\$14,194,790             | \$3,407,506,715  | -\$15,032,802             |
| Total societal costs                   | \$14,118,610,795 | \$14,209,480,829 | \$90,870,035              | \$15,162,395,247 | \$1,043,784,452           |
| ICER– years of life lived              | .                | .                | 3744                      | .                | 29,344                    |
| ICER – QALYs                           | .                | .                | 9977                      | .                | 79,280                    |
| SICER – years of life lived            | .                | .                | 3239                      | .                | 28,927                    |
| SICER – QALYs                          | .                | .                | 8629                      | .                | 78,154                    |

All costs are presented in 2020 Australian dollars. All health economic outcomes have been subject to 5% annual discounting.

Abbreviations: SGLT2i – sodium-glucose co-transporter 2 inhibitor; GLP-1 RA – glucagon-like peptide 1 receptor agonist; ICER – incremental cost-effectiveness ratio; QALY – Quality Adjusted Life Year.

ESM Table 4 – Results from the base-case analysis ages 10-39 only. Note – these are not lifetime projections, only events that happen while an individual is within the age group.

| <b>Total population</b>             |                 |                 |                           |                 |                           |
|-------------------------------------|-----------------|-----------------|---------------------------|-----------------|---------------------------|
|                                     | Current use     | SGLT2i use      |                           | GLP-1 RA use    |                           |
|                                     |                 | Absolute value  | Difference to current use | Absolute value  | Difference to current use |
| Myocardial infarctions              | 903             | 856             | -47 (-5.3%)               | 839             | -64 (-7.1%)               |
| Strokes                             | 442             | 437             | -5 (-1.2%)                | 389             | -53 (-12.0%)              |
| Hospitalisations for heart failure  | 1188            | 937             | -251 (-21.1%)             | 1087            | -101 (-8.5%)              |
| End-stage kidney disease            | 468             | 377             | -91 (-19.4%)              | 466             | -1 (-0.3%)                |
| Deaths                              | 1410            | 1312            | -98 (-6.9%)               | 1292            | -118 (-8.3%)              |
| Years of life lived                 | 672,040         | 672,380         | 340 (0.1%)                | 672,452         | 412 (0.1%)                |
| Quality-adjusted life years         | 357,809         | 358,060         | 251 (0.1%)                | 358,055         | 246 (0.1%)                |
| Acute healthcare costs              | \$27,041,108    | \$24,437,225    | -\$2,603,883              | \$24,732,147    | -\$2,308,961              |
| Chronic healthcare costs            | \$1,636,255,456 | \$1,614,127,444 | -\$22,128,012             | \$1,635,185,516 | -\$1,069,940              |
| SGLT2i costs                        | \$61,098,507    | \$229,321,999   | \$168,223,492             | \$61,133,388    | \$34,881                  |
| GLP-1 RA costs                      | \$36,055,715    | \$36,087,597    | \$31,882                  | \$541,144,479   | \$505,088,765             |
| Total healthcare costs              | \$1,760,450,786 | \$1,903,974,265 | 143,523,479 (8.2%)        | \$2,262,195,530 | 501,744,744 (28.5%)       |
| Acute absenteeism costs             | \$10,061,453    | \$9,603,044     | -\$458,410                | \$9,151,701     | -\$909,753                |
| Chronic absenteeism costs           | \$292,558,339   | \$292,439,564   | -\$118,775                | \$292,555,997   | -\$2,342                  |
| Non-participation costs - morbidity | \$1,134,478,256 | \$1,129,269,784 | -\$5,208,472              | \$1,133,751,544 | -\$726,712                |
| Non-participation costs - mortality | \$169,084,516   | \$157,462,179   | -\$11,622,337             | \$154,975,295   | -\$14,109,221             |
| Total productivity costs            | \$1,606,182,564 | \$1,588,774,571 | -\$17,407,994             | \$1,590,434,537 | -\$15,748,028             |
| Total societal costs                | \$3,366,633,350 | \$3,492,748,835 | \$126,115,485             | \$3,852,630,067 | \$485,996,717             |
| ICER– years of life lived           | .               | .               | 422,210                   | .               | 1,217,486                 |
| ICER – QALYs                        | .               | .               | 571,551                   | .               | 2,039,289                 |
| SICER – years of life lived         | .               | .               | 371,000                   | .               | 1,179,273                 |

|                                        |               |                |                           |                |                           |
|----------------------------------------|---------------|----------------|---------------------------|----------------|---------------------------|
| SICER – QALYs                          | .             | .              | 502,227                   | .              | 1,975,283                 |
| <b>Secondary prevention population</b> |               |                |                           |                |                           |
|                                        | Current use   | SGLT2i use     |                           | GLP-1 RA use   |                           |
|                                        |               | Absolute value | Difference to current use | Absolute value | Difference to current use |
| Myocardial infarctions                 | 76            | 72             | -4 (-5.2%)                | 71             | -5 (-6.7%)                |
| Strokes                                | 24            | 24             | -0 (-1.2%)                | 21             | -3 (-11.5%)               |
| Hospitalisations for heart failure     | 242           | 196            | -46 (-19.0%)              | 224            | -18 (-7.5%)               |
| End-stage kidney disease               | 45            | 36             | -8 (-18.8%)               | 45             | 0 (0.3%)                  |
| Deaths                                 | 66            | 61             | -4 (-6.5%)                | 61             | -5 (-7.5%)                |
| Years of life lived                    | 12,267        | 12,279         | 12 (0.1%)                 | 12,281         | 14 (0.1%)                 |
| Quality-adjusted life years            | 5485          | 5492           | 7 (0.1%)                  | 5491           | 6 (0.1%)                  |
| Acute healthcare costs                 | \$2,686,393   | \$2,343,787    | -\$342,606                | \$2,482,081    | -\$204,312                |
| Chronic healthcare costs               | \$79,129,650  | \$77,747,854   | -\$1,381,796              | \$79,214,875   | \$85,225                  |
| SGLT2i costs                           | \$1,057,372   | \$3,975,719    | \$2,918,348               | \$1,058,486    | \$1114                    |
| GLP-1 RA costs                         | \$623,981     | \$625,645      | \$1664                    | \$9,369,571    | \$8,745,590               |
| Total healthcare costs                 | \$83,497,395  | \$84,693,005   | 1,195,610 (1.4%)          | \$92,125,013   | 8,627,618 (10.3%)         |
| Acute absenteeism costs                | \$782,998     | \$735,076      | -\$47,922                 | \$719,224      | -\$63,774                 |
| Chronic absenteeism costs              | \$9,527,661   | \$9,541,912    | \$14,251                  | \$9,538,144    | \$10,483                  |
| Non-participation costs - morbidity    | \$47,062,991  | \$46,820,232   | -\$242,759                | \$47,107,657   | \$44,666                  |
| Non-participation costs - mortality    | \$6,663,269   | \$6,240,525    | -\$422,744                | \$6,161,801    | -\$501,468                |
| Total productivity costs               | \$64,036,919  | \$63,337,745   | -\$699,174                | \$63,526,825   | -\$510,094                |
| Total societal costs                   | \$147,534,314 | \$148,030,750  | \$496,436                 | \$155,651,839  | \$8,117,524               |
| ICER– years of life lived              | .             | .              | 100,902                   | .              | 618,776                   |
| ICER – QALYs                           | .             | .              | 179,399                   | .              | 1,344,138                 |
| SICER – years of life lived            | .             | .              | 41,896                    | .              | 582,192                   |
| SICER – QALYs                          | .             | .              | 74,489                    | .              | 1264,668                  |

All costs are presented in 2020 Australian dollars. All health economic outcomes have been subject to 5% annual discounting.

Abbreviations: SGLT2i – sodium-glucose co-transporter 2 inhibitor; GLP-1 RA – glucagon-like peptide 1 receptor agonist; ICER – incremental cost-effectiveness ratio; QALY – Quality Adjusted Life Year.

ESM Table 5 – Results from the base-case analysis ages 40-59 only. Note – these are not lifetime projections, only events that happen while an individual is within the age group.

| <b>Total population</b>             |                  |                  |                           |                  |                           |
|-------------------------------------|------------------|------------------|---------------------------|------------------|---------------------------|
|                                     | Current use      | SGLT2i use       |                           | GLP-1 RA use     |                           |
|                                     |                  | Absolute value   | Difference to current use | Absolute value   | Difference to current use |
| Myocardial infarctions              | 34,908           | 32,878           | -2029 (-5.8%)             | 32,358           | -2549 (-7.3%)             |
| Strokes                             | 14,262           | 14,075           | -187 (-1.3%)              | 12,522           | -1740 (-12.2%)            |
| Hospitalisations for heart failure  | 23,965           | 18,566           | -5399 (-22.5%)            | 21,781           | -2184 (-9.1%)             |
| End-stage kidney disease            | 7110             | 5706             | -1404 (-19.7%)            | 7078             | -32 (-0.4%)               |
| Deaths                              | 35,497           | 32,971           | -2527 (-7.1%)             | 32,611           | -2886 (-8.1%)             |
| Years of life lived                 | 5,826,833        | 5,838,283        | 11,450 (0.2%)             | 5,840,189        | 13,356 (0.2%)             |
| Quality-adjusted life years         | 2,982,569        | 2,989,414        | 6846 (0.2%)               | 2,989,982        | 7413 (0.2%)               |
| Acute healthcare costs              | \$771,047,612    | \$704,508,402    | -\$66,539,210             | \$704,465,182    | -\$66,582,430             |
| Chronic healthcare costs            | \$17,103,519,104 | \$16,682,545,792 | -\$420,973,312            | \$17,076,299,392 | -\$27,219,712             |
| SGLT2i costs                        | \$530,741,893    | \$1,995,648,168  | \$1,464,906,275           | \$531,848,750    | \$1,106,857               |
| GLP-1 RA costs                      | \$313,203,696    | \$314,048,133    | \$844,437                 | \$4,707,853,184  | \$4,394,649,488           |
| Total healthcare costs              | \$18,718,512,305 | \$19,696,750,495 | 978,238,190 (5.2%)        | \$23,020,466,508 | 4,301,954,203 (23.0%)     |
| Acute absenteeism costs             | \$306,415,079    | \$292,660,707    | -\$13,754,372             | \$278,558,722    | -\$27,856,357             |
| Chronic absenteeism costs           | \$2,455,667,440  | \$2,455,278,576  | -\$388,864                | \$2,456,421,088  | \$753,648                 |
| Non-participation costs - morbidity | \$17,346,443,712 | \$17,279,776,512 | -\$66,667,200             | \$17,339,140,480 | -\$7,303,232              |
| Non-participation costs - mortality | \$5,309,058,524  | \$4,939,610,432  | -\$369,448,092            | \$4,875,576,936  | -\$433,481,588            |
| Total productivity costs            | \$25,417,584,755 | \$24,967,326,227 | -\$450,258,528            | \$24,949,697,226 | -\$467,887,529            |
| Total societal costs                | \$44,136,097,060 | \$44,664,076,722 | \$527,979,662             | \$47,970,163,734 | \$3,834,066,674           |
| ICER– years of life lived           | .                | .                | 85,433                    | .                | 322,088                   |
| ICER – QALYs                        | .                | .                | 142,900                   | .                | 580,326                   |
| SICER – years of life lived         | .                | .                | 46,110                    | .                | 287,057                   |

|                                        |                 |                 |                           |                 |                           |
|----------------------------------------|-----------------|-----------------|---------------------------|-----------------|---------------------------|
| SICER – QALYs                          | .               | .               | 77,127                    | .               | 517,209                   |
| <b>Secondary prevention population</b> |                 |                 |                           |                 |                           |
|                                        | Current use     | SGLT2i use      |                           | GLP-1 RA use    |                           |
|                                        |                 | Absolute value  | Difference to current use | Absolute value  | Difference to current use |
| Myocardial infarctions                 | 11,137          | 10,556          | -581 (-5.2%)              | 10,440          | -697 (-6.3%)              |
| Strokes                                | 3129            | 3091            | -37 (-1.2%)               | 2776            | -353 (-11.3%)             |
| Hospitalisations for heart failure     | 10,220          | 8241            | -1979 (-19.4%)            | 9449            | -771 (-7.5%)              |
| End-stage kidney disease               | 1779            | 1450            | -329 (-18.5%)             | 1788            | 10 (0.5%)                 |
| Deaths                                 | 5834            | 5463            | -372 (-6.4%)              | 5428            | -406 (-7.0%)              |
| Years of life lived                    | 418,759         | 420,148         | 1389 (0.3%)               | 420,313         | 1553 (0.4%)               |
| Quality-adjusted life years            | 183,098         | 183,747         | 649 (0.4%)                | 183,783         | 685 (0.4%)                |
| Acute healthcare costs                 | \$212,211,875   | \$192,961,976   | -\$19,249,899             | \$196,503,938   | -\$15,707,938             |
| Chronic healthcare costs               | \$2,923,504,808 | \$2,861,698,376 | -\$61,806,432             | \$2,932,403,488 | \$8,898,680               |
| SGLT2i costs                           | \$36,105,075    | \$136,140,751   | \$100,035,676             | \$36,228,699    | \$123,625                 |
| GLP-1 RA costs                         | \$21,306,483    | \$21,423,991    | \$117,508                 | \$320,691,542   | \$299,385,059             |
| Total healthcare costs                 | \$3,193,128,240 | \$3,212,225,093 | 19,096,853 (0.6%)         | \$3,485,827,667 | 292,699,426 (9.2%)        |
| Acute absenteeism costs                | \$80,685,326    | \$76,941,614    | -\$3,743,712              | \$74,380,785    | -\$6,304,541              |
| Chronic absenteeism costs              | \$279,466,989   | \$280,449,292   | \$982,303                 | \$280,443,535   | \$976,546                 |
| Non-participation costs - morbidity    | \$2,501,852,856 | \$2,501,213,608 | -\$639,248                | \$2,509,434,312 | \$7,581,456               |
| Non-participation costs - mortality    | \$707,620,121   | \$663,295,157   | -\$44,324,964             | \$657,416,716   | -\$50,203,406             |
| Total productivity costs               | \$3,569,625,292 | \$3,521,899,671 | -\$47,725,621             | \$3,521,675,347 | -\$47,949,945             |
| Total societal costs                   | \$6,762,753,532 | \$6,734,124,765 | -\$28,628,767             | \$7,007,503,014 | \$244,749,482             |
| ICER– years of life lived              | .               | .               | 13,751                    | .               | 188,444                   |
| ICER – QALYs                           | .               | .               | 29,420                    | .               | 427,259                   |
| SICER – years of life lived            | .               | .               | Dominant                  | .               | 157,573                   |
| SICER – QALYs                          | .               | .               | Dominant                  | .               | 357,266                   |

All costs are presented in 2020 Australian dollars. All health economic outcomes have been subject to 5% annual discounting.

Abbreviations: SGLT2i – sodium-glucose co-transporter 2 inhibitor; GLP-1 RA – glucagon-like peptide 1 receptor agonist; ICER – incremental cost-effectiveness ratio; QALY – Quality Adjusted Life Year.



ESM Table 6 – Results from the base-case analysis ages 60-79 only. Note – these are not lifetime projections, only events that happen while an individual is within the age group.

| <b>Total population</b>             |                  |                  |                           |                  |                           |
|-------------------------------------|------------------|------------------|---------------------------|------------------|---------------------------|
|                                     | Current use      | SGLT2i use       |                           | GLP-1 RA use     |                           |
|                                     |                  | Absolute value   | Difference to current use | Absolute value   | Difference to current use |
| Myocardial infarctions              | 150,044          | 141,491          | -8553 (-5.7%)             | 139,895          | -10,149 (-6.8%)           |
| Strokes                             | 92,287           | 91,613           | -674 (-0.7%)              | 81,181           | -11,106 (-12.0%)          |
| Hospitalisations for heart failure  | 232,422          | 176,165          | -56,257 (-24.2%)          | 211,377          | -21,045 (-9.1%)           |
| End-stage kidney disease            | 23,747           | 19,018           | -4729 (-19.9%)            | 23,827           | 79 (0.3%)                 |
| Deaths                              | 352,658          | 329,521          | -23,137 (-6.6%)           | 327,225          | -25,433 (-7.2%)           |
| Years of life lived                 | 14,382,011       | 14,511,244       | 129,232 (0.9%)            | 14,527,517       | 145,506 (1.0%)            |
| Quality-adjusted life years         | 6,997,179        | 7,059,168        | 61,989 (0.9%)             | 7,065,606        | 68,427 (1.0%)             |
| Acute healthcare costs              | \$5,438,278,944  | \$4,886,220,672  | -\$552,058,272            | \$4,984,636,608  | -\$453,642,336            |
| Chronic healthcare costs            | \$48,131,948,544 | \$46,790,219,136 | -\$1,341,729,408          | \$48,258,876,928 | \$126,928,384             |
| SGLT2i costs                        | \$1,300,805,444  | \$4,923,304,320  | \$3,622,498,876           | \$1,312,538,288  | \$11,732,844              |
| GLP-1 RA costs                      | \$767,636,920    | \$774,763,072    | \$7,126,152               | \$11,618,411,296 | \$10,850,774,376          |
| Total healthcare costs              | \$55,638,669,852 | \$57,374,507,200 | 1,735,837,348 (3.1%)      | \$66,174,463,120 | 10,535,793,268 (18.9%)    |
| Acute absenteeism costs             | \$260,977,541    | \$250,096,743    | -\$10,880,799             | \$237,773,575    | -\$23,203,967             |
| Chronic absenteeism costs           | \$1,470,398,180  | \$1,475,175,116  | \$4,776,936               | \$1,477,139,608  | \$6,741,428               |
| Non-participation costs - morbidity | \$20,742,337,280 | \$20,616,842,880 | -\$125,494,400            | \$20,644,137,024 | -\$98,200,256             |
| Non-participation costs - mortality | \$8,242,719,208  | \$7,671,237,448  | -\$571,481,760            | \$7,586,707,376  | -\$656,011,832            |
| Total productivity costs            | \$30,716,432,209 | \$30,013,352,187 | -\$703,080,023            | \$29,945,757,583 | -\$770,674,627            |
| Total societal costs                | \$86,355,102,061 | \$87,387,859,387 | \$1,032,757,326           | \$96,120,220,703 | \$9,765,118,642           |
| ICER– years of life lived           | .                | .                | 13,432                    | .                | 72,408                    |
| ICER – QALYs                        | .                | .                | 28,002                    | .                | 153,971                   |
| SICER – years of life lived         | .                | .                | 7991                      | .                | 67,111                    |

|                                        |                  |                  |                           |                  |                           |
|----------------------------------------|------------------|------------------|---------------------------|------------------|---------------------------|
| SICER – QALYs                          | .                | .                | 16,660                    | .                | 142,708                   |
| <b>Secondary prevention population</b> |                  |                  |                           |                  |                           |
|                                        | Current use      | SGLT2i use       |                           | GLP-1 RA use     |                           |
|                                        |                  | Absolute value   | Difference to current use | Absolute value   | Difference to current use |
| Myocardial infarctions                 | 73,426           | 69,929           | -3497 (-4.8%)             | 69,476           | -3950 (-5.4%)             |
| Strokes                                | 36,474           | 36,381           | -93 (-0.3%)               | 32,607           | -3867 (-10.6%)            |
| Hospitalisations for heart failure     | 152,721          | 122,577          | -30,144 (-19.7%)          | 142,399          | -10,322 (-6.8%)           |
| End-stage kidney disease               | 9673             | 7961             | -1711 (-17.7%)            | 9879             | 206 (2.1%)                |
| Deaths                                 | 105,129          | 100,052          | -5078 (-4.8%)             | 99,304           | -5826 (-5.5%)             |
| Years of life lived                    | 2,039,191        | 2,065,907        | 26,716 (1.3%)             | 2,069,807        | 30,616 (1.5%)             |
| Quality-adjusted life years            | 832122           | 842644           | 10,521 (1.3%)             | 843,987          | 11,864 (1.4%)             |
| Acute healthcare costs                 | \$2,383,714,216  | \$2,141,529,832  | -\$242,184,384            | \$2,222,781,896  | -\$160,932,320            |
| Chronic healthcare costs               | \$13,964,117,440 | \$13,723,337,504 | -\$240,779,936            | \$14,134,341,056 | \$170,223,616             |
| SGLT2i costs                           | \$172,860,138    | \$657,776,766    | \$484,916,629             | \$175,243,448    | \$2,383,310               |
| GLP-1 RA costs                         | \$102,008,969    | \$103,512,016    | \$1,503,047               | \$1,551,231,244  | \$1,449,222,275           |
| Total healthcare costs                 | \$16,622,700,763 | \$16,626,156,118 | 3,455,355 (0.0%)          | \$18,083,597,644 | 1,460,896,881 (8.8%)      |
| Acute absenteeism costs                | \$79,590,492     | \$76,059,382     | -\$3,531,110              | \$73,696,108     | -\$5,894,384              |
| Chronic absenteeism costs              | \$200,159,565    | \$201,678,615    | \$1,519,050               | \$201,864,236    | \$1,704,672               |
| Non-participation costs - morbidity    | \$6,577,697,920  | \$6,610,658,368  | \$32,960,448              | \$6,617,250,016  | \$39,552,096              |
| Non-participation costs - mortality    | \$1,694,475,256  | \$1,592,768,446  | -\$101,706,810            | \$1,580,359,330  | -\$114,115,926            |
| Total productivity costs               | \$8,551,923,232  | \$8,481,164,811  | -\$70,758,422             | \$8,473,169,690  | -\$78,753,542             |
| Total societal costs                   | \$25,174,623,995 | \$25,107,320,928 | -\$67,303,067             | \$26,556,767,334 | \$1,382,143,339           |
| ICER– years of life lived              | .                | .                | 129                       | .                | 47,717                    |
| ICER – QALYs                           | .                | .                | 328                       | .                | 123,135                   |
| SICER – years of life lived            | .                | .                | Dominant                  | .                | 45,145                    |
| SICER – QALYs                          | .                | .                | Dominant                  | .                | 116,497                   |

All costs are presented in 2020 Australian dollars. All health economic outcomes have been subject to 5% annual discounting.

Abbreviations: SGLT2i – sodium-glucose co-transporter 2 inhibitor; GLP-1 RA – glucagon-like peptide 1 receptor agonist; ICER – incremental cost-effectiveness ratio; QALY – Quality Adjusted Life Year.

ESM Table 7 – Results from the base-case analysis ages 80+ only. Note – these are not lifetime projections, only events that happen while an individual is within the age group.

| <b>Total population</b>             |                  |                  |                           |                  |                           |
|-------------------------------------|------------------|------------------|---------------------------|------------------|---------------------------|
|                                     | Current use      | SGLT2i use       |                           | GLP-1 RA use     |                           |
|                                     |                  | Absolute value   | Difference to current use | Absolute value   | Difference to current use |
| Myocardial infarctions              | 108,569          | 105,822          | -2747 (-2.5%)             | 104,876          | -3693 (-3.4%)             |
| Strokes                             | 80,484           | 82,713           | 2229 (2.8%)               | 72,973           | -7511 (-9.3%)             |
| Hospitalisations for heart failure  | 235,121          | 179,787          | -55,334 (-23.5%)          | 221,352          | -13,770 (-5.9%)           |
| End-stage kidney disease            | 3494             | 2847             | -647 (-18.5%)             | 3618             | 124 (3.6%)                |
| Deaths                              | 666,154          | 655,926          | -10,228 (-1.5%)           | 654,674          | -11,480 (-1.7%)           |
| Years of life lived                 | 5,977,719        | 6,236,714        | 258,996 (4.3%)            | 6,278,472        | 300,753 (5.0%)            |
| Quality-adjusted life years         | 2,703,857        | 2,811,217        | 107,360 (4.0%)            | 2,828,703        | 124,845 (4.6%)            |
| Acute healthcare costs              | \$6,525,814,032  | \$6,101,249,120  | -\$424,564,912            | \$6,252,849,216  | -\$272,964,816            |
| Chronic healthcare costs            | \$17,738,606,976 | \$17,960,598,912 | \$221,991,936             | \$18,345,631,104 | \$607,024,128             |
| SGLT2i costs                        | \$524,026,184    | \$2,041,716,856  | \$1,517,690,672           | \$547,571,892    | \$23,545,708              |
| GLP-1 RA costs                      | \$309,240,586    | \$321,297,801    | \$12,057,215              | \$4,847,032,336  | \$4,537,791,750           |
| Total healthcare costs              | \$25,097,687,778 | \$26,424,862,689 | 1,327,174,911 (5.3%)      | \$29,993,084,548 | 4,895,396,770 (19.5%)     |
| Acute absenteeism costs             | \$0              | \$0              | \$0                       | \$0              | \$0                       |
| Chronic absenteeism costs           | \$0              | \$0              | \$0                       | \$0              | \$0                       |
| Non-participation costs - morbidity | \$0              | \$0              | \$0                       | \$0              | \$0                       |
| Non-participation costs - mortality | \$0              | \$0              | \$0                       | \$0              | \$0                       |
| Total productivity costs            | \$0              | \$0              | \$0                       | \$0              | \$0                       |
| Total societal costs                | \$25,097,687,778 | \$26,424,862,689 | \$1,327,174,911           | \$29,993,084,548 | \$4,895,396,770           |
| ICER– years of life lived           | .                | .                | 5124                      | .                | 16,277                    |
| ICER – QALYs                        | .                | .                | 12,362                    | .                | 39,212                    |
| SICER – years of life lived         | .                | .                | 5124                      | .                | 16,277                    |

|                                        |                  |                  |                           |                  |                           |
|----------------------------------------|------------------|------------------|---------------------------|------------------|---------------------------|
| SICER – QALYs                          | .                | .                | 12,362                    | .                | 39,212                    |
| <b>Secondary prevention population</b> |                  |                  |                           |                  |                           |
|                                        | Current use      | SGLT2i use       |                           | GLP-1 RA use     |                           |
|                                        |                  | Absolute value   | Difference to current use | Absolute value   | Difference to current use |
| Myocardial infarctions                 | 62,078           | 60,757           | -1321 (-2.1%)             | 60,519           | -1559 (-2.5%)             |
| Strokes                                | 40,447           | 41,573           | 1126 (2.8%)               | 37,203           | -3244 (-8.0%)             |
| Hospitalisations for heart failure     | 177,816          | 143,494          | -34,322 (-19.3%)          | 170,691          | -7125 (-4.0%)             |
| End-stage kidney disease               | 1719             | 1443             | -276 (-16.0%)             | 1816             | 97 (5.7%)                 |
| Deaths                                 | 234,731          | 233,185          | -1546 (-0.7%)             | 232,711          | -2020 (-0.9%)             |
| Years of life lived                    | 1,247,237        | 1,297,376        | 50,139 (4.0%)             | 1,312,081        | 64,844 (5.2%)             |
| Quality-adjusted life years            | 482,038          | 500,218          | 18,180 (3.8%)             | 505,573          | 23,534 (4.9%)             |
| Acute healthcare costs                 | \$3,127,021,216  | \$2,897,929,456  | -\$229,091,760            | \$3,021,110,848  | -\$105,910,368            |
| Chronic healthcare costs               | \$6,730,789,120  | \$6,889,586,592  | \$158,797,472             | \$7,031,207,648  | \$300,418,528             |
| SGLT2i costs                           | \$105,448,311    | \$410,299,658    | \$304,851,348             | \$110,517,856    | \$5,069,546               |
| GLP-1 RA costs                         | \$62,227,612     | \$64,567,413     | \$2,339,802               | \$978,289,104    | \$916,061,492             |
| Total healthcare costs                 | \$10,025,486,258 | \$10,262,383,119 | 236,896,861 (2.4%)        | \$11,141,125,456 | 1,115,639,198 (11.1%)     |
| Acute absenteeism costs                | \$0              | \$0              | \$0                       | \$0              | \$0                       |
| Chronic absenteeism costs              | \$0              | \$0              | \$0                       | \$0              | \$0                       |
| Non-participation costs - morbidity    | \$0              | \$0              | \$0                       | \$0              | \$0                       |
| Non-participation costs - mortality    | \$0              | \$0              | \$0                       | \$0              | \$0                       |
| Total productivity costs               | \$0              | \$0              | \$0                       | \$0              | \$0                       |
| Total societal costs                   | \$10,025,486,258 | \$10,262,383,119 | \$236,896,861             | \$11,141,125,456 | \$1,115,639,198           |
| ICER– years of life lived              | .                | .                | 4725                      | .                | 17,205                    |
| ICER – QALYs                           | .                | .                | 13,031                    | .                | 47,405                    |
| SICER – years of life lived            | .                | .                | 4725                      | .                | 17,205                    |
| SICER – QALYs                          | .                | .                | 13,031                    | .                | 47,405                    |

All costs are presented in 2020 Australian dollars. All health economic outcomes have been subject to 5% annual discounting.

Abbreviations: SGLT2i – sodium-glucose co-transporter 2 inhibitor; GLP-1 RA – glucagon-like peptide 1 receptor agonist; ICER – incremental cost-effectiveness ratio; QALY – Quality Adjusted Life Year.

ESM Table 8 – Results from Scenario analyses. Incremental costs and benefits are as compared to the current use condition for each scenario.

| Total population                         |            |                        |         |              |                        |         |
|------------------------------------------|------------|------------------------|---------|--------------|------------------------|---------|
| Scenario                                 | SGLT2i use |                        |         | GLP-1 RA use |                        |         |
|                                          | QALYs      | Total Healthcare costs | ICER    | QALYs        | Total Healthcare costs | ICER    |
| Base-case                                | 176,446    | \$4,184,773,888        | 23,717  | 200,932      | \$20,234,887,168       | 100,705 |
| Differential medication costs            | 176,446    | \$1,487,034,368        | 8428    | 200,932      | \$16,801,423,360       | 83,618  |
| SGLT2i in combination with metformin     | 176,446    | \$2,575,642,880        | 14,597  | 200,932      | \$20,226,236,416       | 100,662 |
| Off-patent costs                         | 176,446    | \$788,084,416          | 4466    | 200,932      | \$10,072,525,824       | 50,129  |
| Lower adherence                          | 176,446    | \$2,487,833,344        | 14,100  | 200,932      | \$16,573,888,512       | 82,485  |
| U.S. medication cost                     | 176,446    | \$63,002,533,888       | 357,064 | 200,932      | \$124,912,500,736      | 621,667 |
| Diabetes incidence decreases 4% per year | 171,746    | \$3,807,701,504        | 22,171  | 195,332      | \$18,807,320,576       | 96,284  |
| Diabetes incidence increases 4% per year | 182,449    | \$4,736,184,320        | 25,959  | 208,129      | \$22,302,822,400       | 107,159 |
| Decreasing mortality                     | 171,676    | \$4,019,505,152        | 23,413  | 194,877      | \$20,537,034,752       | 105,385 |
| GLP-1 RAs reduce ESKD by 22%             | 176,390    | \$4,206,257,408        | 23,846  | 205,830      | \$18,782,986,240       | 91,255  |
| 50% use of medications                   | 95,122     | \$2,252,259,328        | 23,678  | 127,866      | \$12,935,984,128       | 101,169 |
| 100% use of medications                  | 259,719    | \$6,170,631,168        | 23,759  | 275,525      | \$27,617,202,176       | 100,235 |
| Private hospitals included               | 179,539    | \$3,681,371,136        | 20,505  | 202,573      | \$19,979,929,600       | 98,631  |
| Timeframe 2020-2030                      | 71,481     | \$2,939,524,352        | 41,123  | 84,266       | \$12,246,132,736       | 145,328 |

|                                          |            |                        |          |              |                        |         |
|------------------------------------------|------------|------------------------|----------|--------------|------------------------|---------|
| Decreasing efficacy<br>5% per year       | 124,409    | \$5,026,678,784        | 40,404   | 141,715      | \$20,163,133,440       | 142,279 |
| Discounting rate:<br>0%                  | 323,840    | \$6,265,424,896        | 19,347   | 365,791      | \$32,547,100,672       | 88,977  |
| Discounting rate:<br>3%                  | 222,477    | \$4,855,525,888        | 21,825   | 252,504      | \$24,154,359,808       | 95,659  |
| Discounting rate:<br>6%                  | 157,982    | \$3,907,565,568        | 24,734   | 180,212      | \$18,634,104,832       | 103,401 |
| <b>Secondary prevention population</b>   |            |                        |          |              |                        |         |
|                                          | SGLT2i use |                        |          | GLP-1 RA use |                        |         |
| Scenario                                 | QALYs      | Total Healthcare costs | ICER     | QALYs        | Total Healthcare costs | ICER    |
| Base-case                                | 29,357     | \$260,645,232          | 8878     | 36,090       | \$2,877,863,424        | 79,742  |
| Differential medication costs            | 29,357     | -\$95,138,384          | Dominant | 36,090       | \$2,424,326,400        | 67,175  |
| SGLT2i in combination with metformin     | 29,357     | \$48,562,112           | 1654     | 36,090       | \$2,876,063,232        | 79,692  |
| Off-patent costs                         | 29,357     | -\$187,696,768         | Dominant | 36,090       | \$1,537,367,424        | 42,598  |
| Lower adherence                          | 29,357     | \$36,751,580           | 1252     | 36,090       | \$2,394,754,560        | 66,355  |
| U.S. medication cost                     | 29,357     | \$8,019,593,728        | 273,174  | 36,090       | \$16,695,443,456       | 462,607 |
| Diabetes incidence decreases 4% per year | 28,505     | \$235,342,096          | 8256     | 34,996       | \$2,736,804,864        | 78,203  |
| Diabetes incidence increases 4% per year | 30,502     | \$296,715,744          | 9728     | 37,567       | \$3,076,770,048        | 81,900  |
| Decreasing mortality                     | 29,357     | \$194,078,224          | 6611     | 36,032       | \$2,987,377,408        | 82,908  |
| GLP-1 RAs reduce ESKD by 22%             | 29,346     | \$265,429,680          | 9045     | 37,466       | \$2,505,744,128        | 66,880  |



|                                 |        |               |        |        |                 |         |
|---------------------------------|--------|---------------|--------|--------|-----------------|---------|
| 50% use of medications          | 15,709 | \$136,815,264 | 8709   | 22,849 | \$1,831,963,776 | 80,178  |
| 100% use of medications         | 43,544 | \$394,097,504 | 9051   | 49,749 | \$3,945,110,528 | 79,300  |
| Private hospitals included      | 30,464 | \$48,148,336  | 1580   | 38,689 | \$3,047,284,992 | 78,764  |
| Timeframe 2020-2030             | 11,271 | \$170,387,744 | 15,117 | 14,613 | \$1,492,741,120 | 102,154 |
| Decreasing efficacy 5% per year | 19,427 | \$506,764,672 | 26,085 | 23,940 | \$2,810,521,600 | 117,398 |
| Discounting rate: 0%            | 54,519 | \$405,412,544 | 7436   | 66,234 | \$4,914,060,288 | 74,193  |
| Discounting rate: 3%            | 37,193 | \$306,779,360 | 8248   | 45,500 | \$3,520,147,968 | 77,366  |
| Discounting rate: 6%            | 26,222 | \$241,767,856 | 9220   | 32,317 | \$2,617,786,112 | 81,004  |

All costs are presented in 2020 Australian dollars. All health economic outcomes have been subject to 5% annual discounting unless otherwise indicated. Abbreviations: SGLT2i – sodium-glucose co-transporter 2 inhibitor; GLP-1 RA – glucagon-like peptide 1 receptor agonist; ICER – incremental cost-effectiveness ratio; QALY – Quality Adjusted Life Year.

ESM Fig. 1 – Age-specific diabetes incidence rates used in the model.

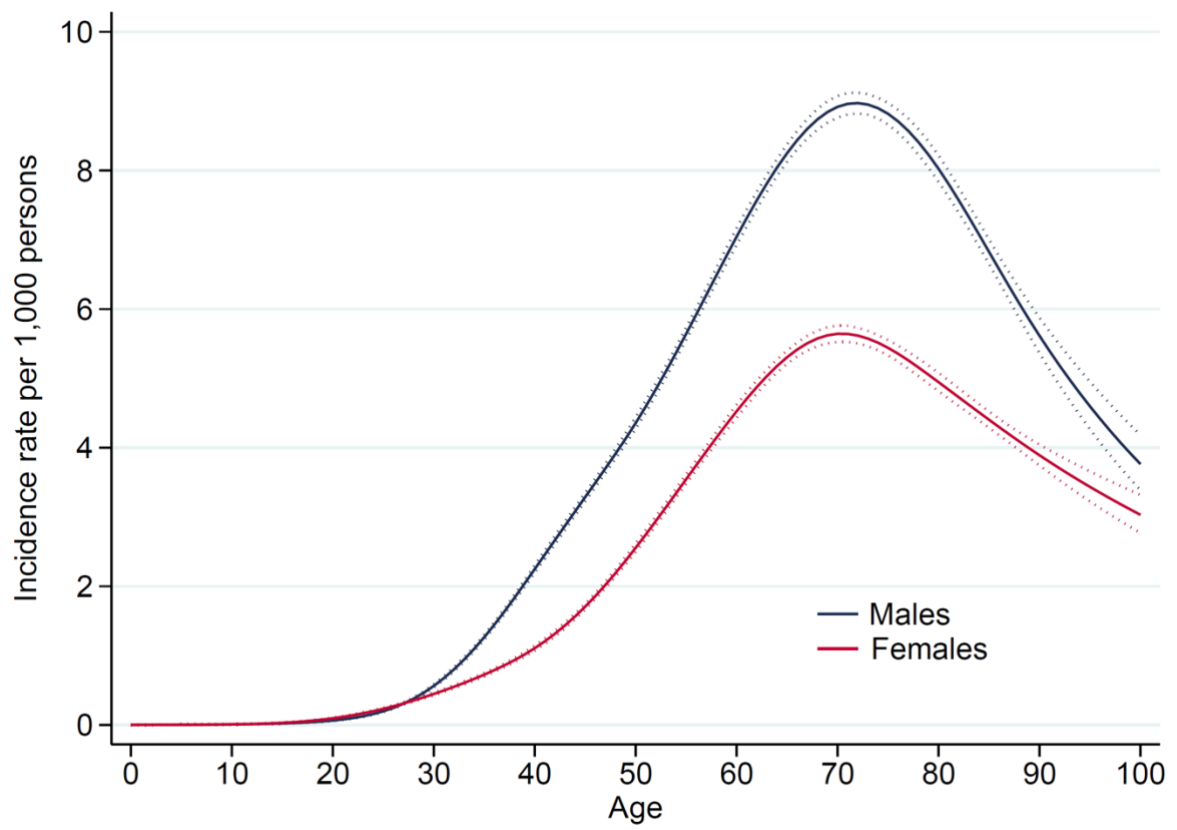

ESM Fig. 2 – Example of the incidence and mortality rates used in the model. Curves show the incidence of hospitalisation for myocardial infarction (MI; **a**), stroke (**b**), and heart failure (HF; **c**), the incidence of end-stage kidney disease (**d**), and all-cause mortality (**e**) by attained age, stratified by sex and age at diagnosis of diabetes (ages 30, 40, 50, 60, 70, and 80). 95% CIs are represented by dotted lines.

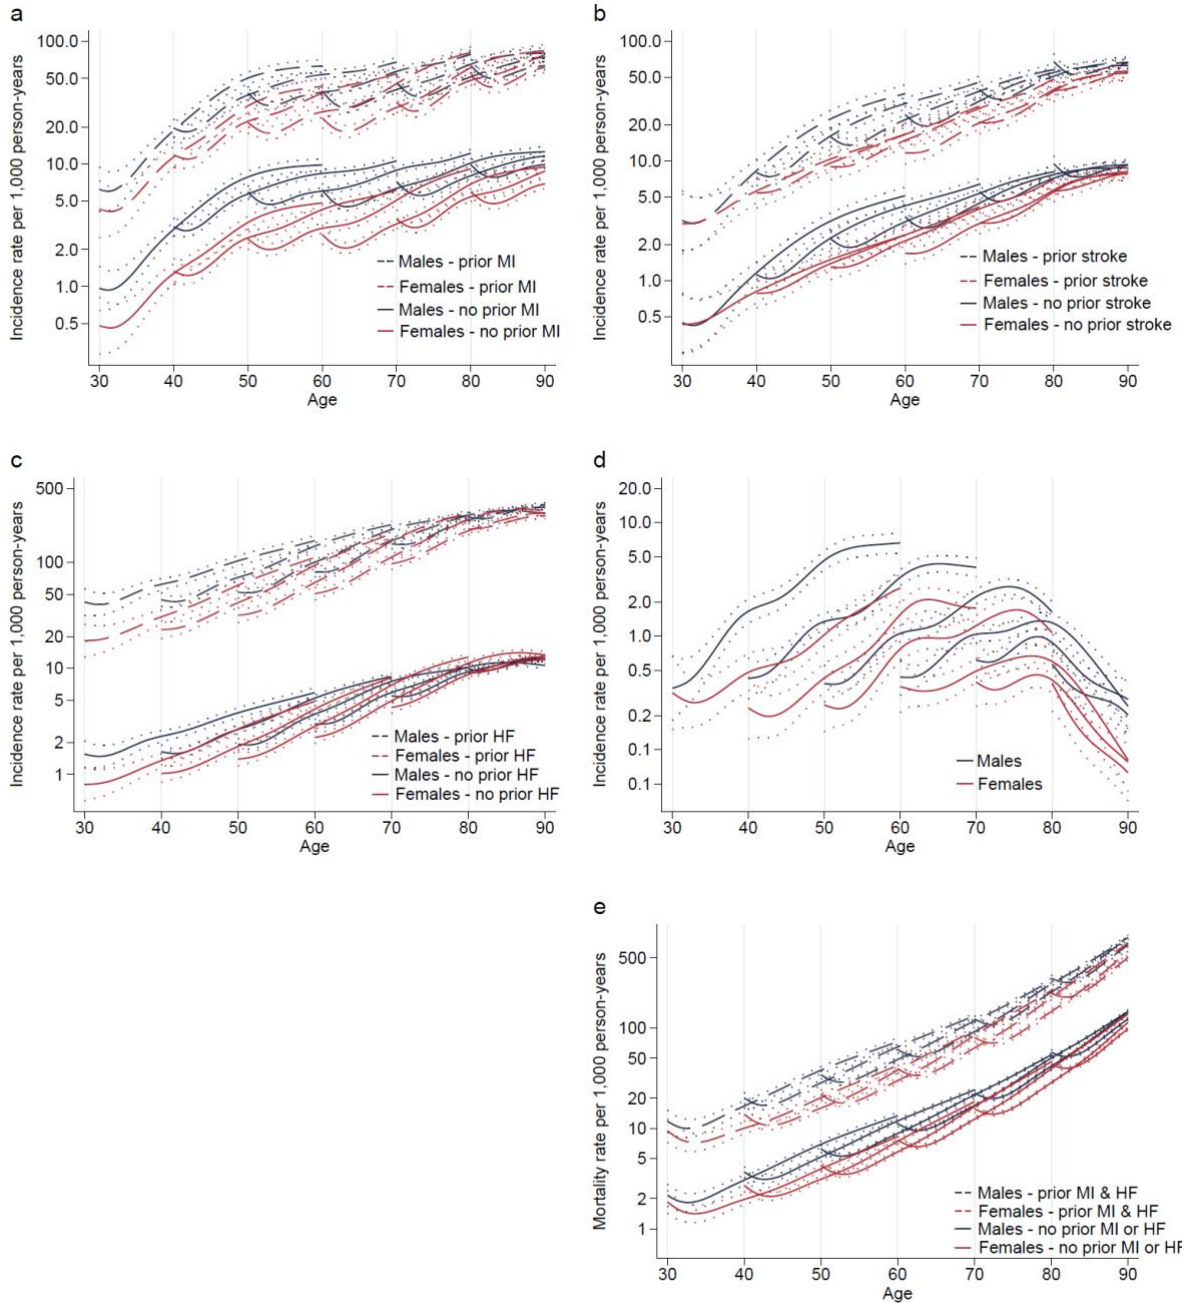

ESM Fig. 3 – Example of the incidence and mortality rates used in the model. Curves show the incidence of hospitalisation for myocardial infarction (MI; **a**), stroke (**b**), and heart failure (HF; **c**), the incidence of end-stage kidney disease (**d**), and all-cause mortality (**e**) by health state for a male aged 60 at diagnosis of diabetes, followed to age 90. Dashed lines indicate a health state for which the outcome is a repeat event.

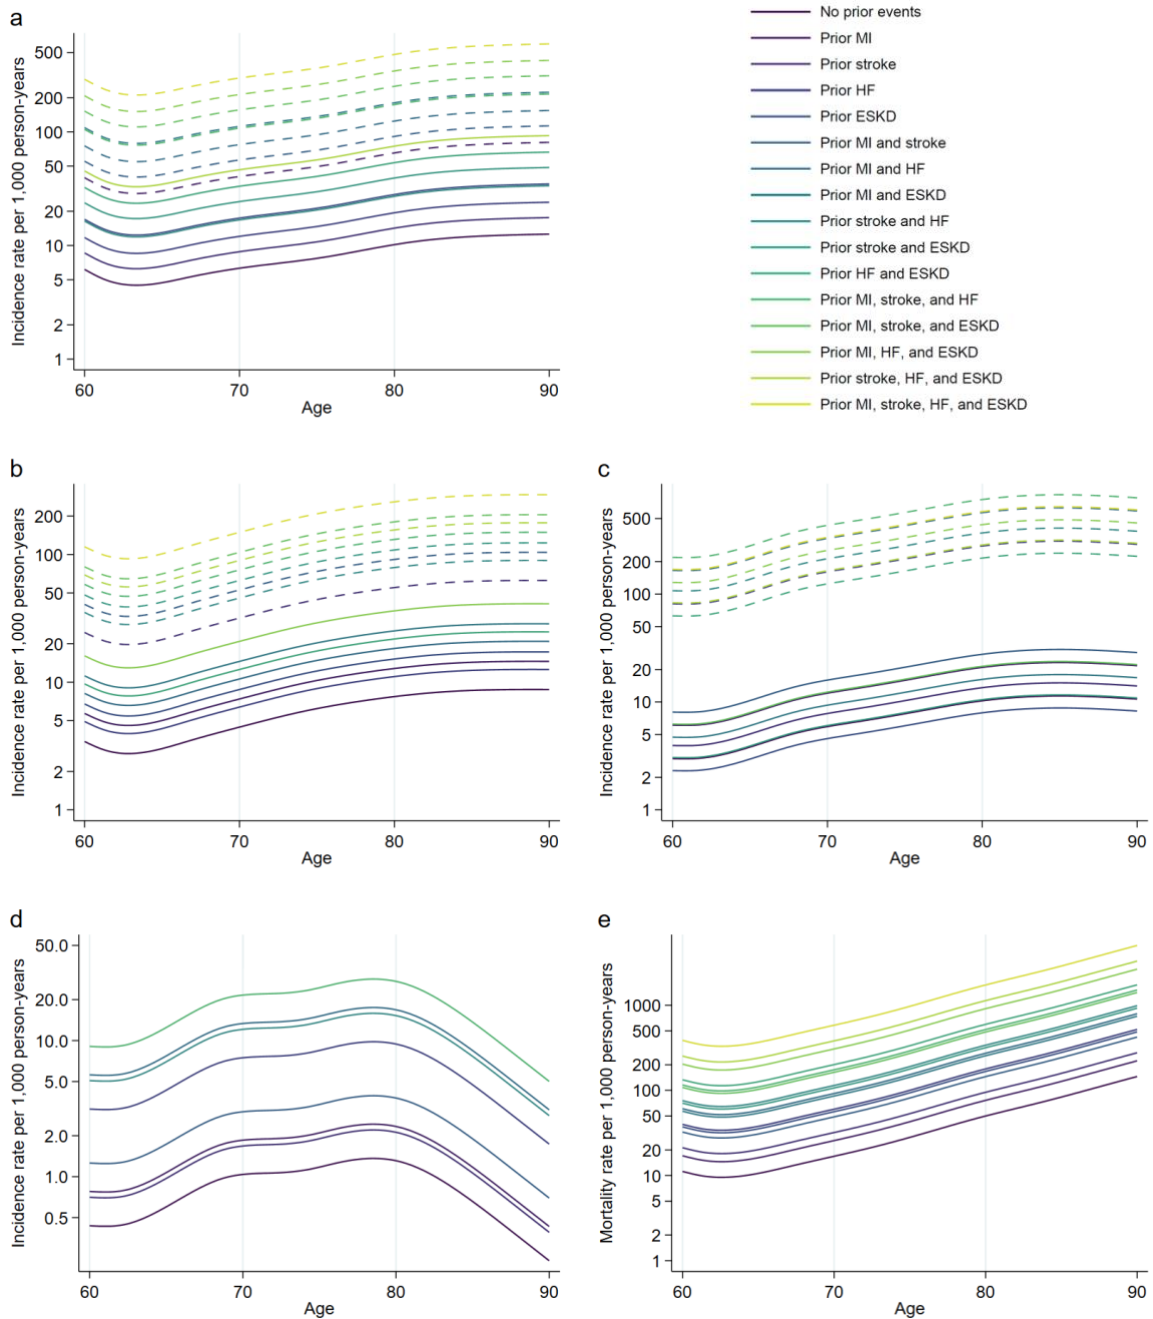

ESM Fig. 4 – Model validation test 1 – Myocardial infarction (MI). Figures show the actual vs. modelled number of MIs, overall (a), by sex (b), prior MI status (c) and age (d). See ESM Methods above for more details.

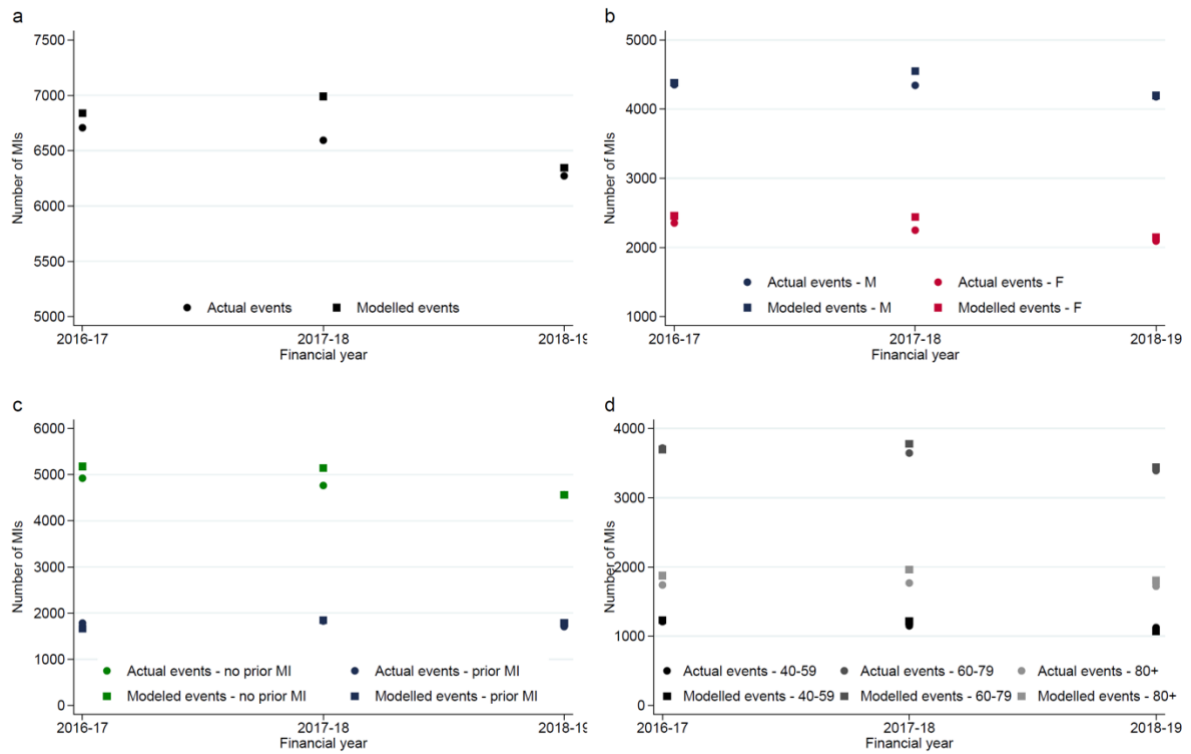

ESM Fig. 5 – Model validation test 1 – Stroke. Figures show the actual vs. modelled number of strokes, overall (a), by sex (b), prior stroke status (c) and age (d). See ESM Methods above for more details.

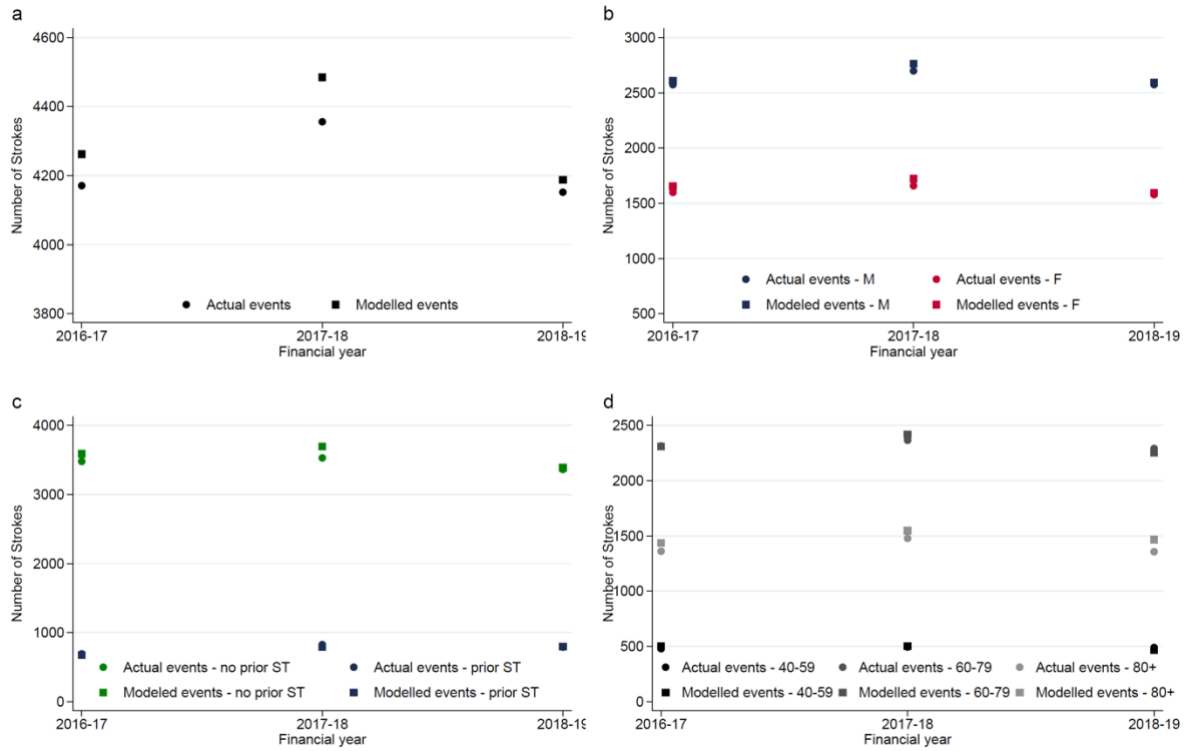

ESM Fig. 6 – Model validation test 1 – Heart failure (HF). Figures show the actual vs. modelled number of HF events, overall (a), by sex (b), prior HF status (c) and age (d). See ESM Methods above for more details.

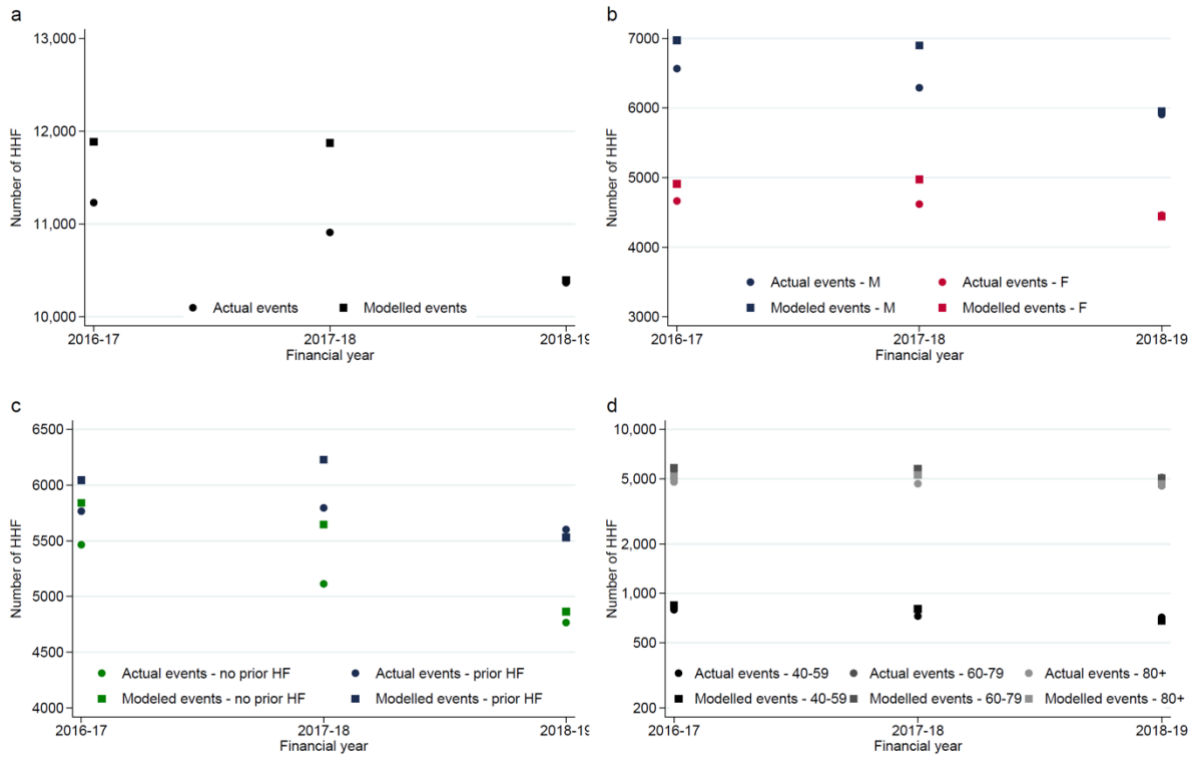

ESM Fig. 7 – Model validation test 1 – End-stage kidney disease (ESKD). Figures show the actual vs. modelled number of ESKD events, overall (a), by sex (b), and age (c). See ESM Methods above for more details.

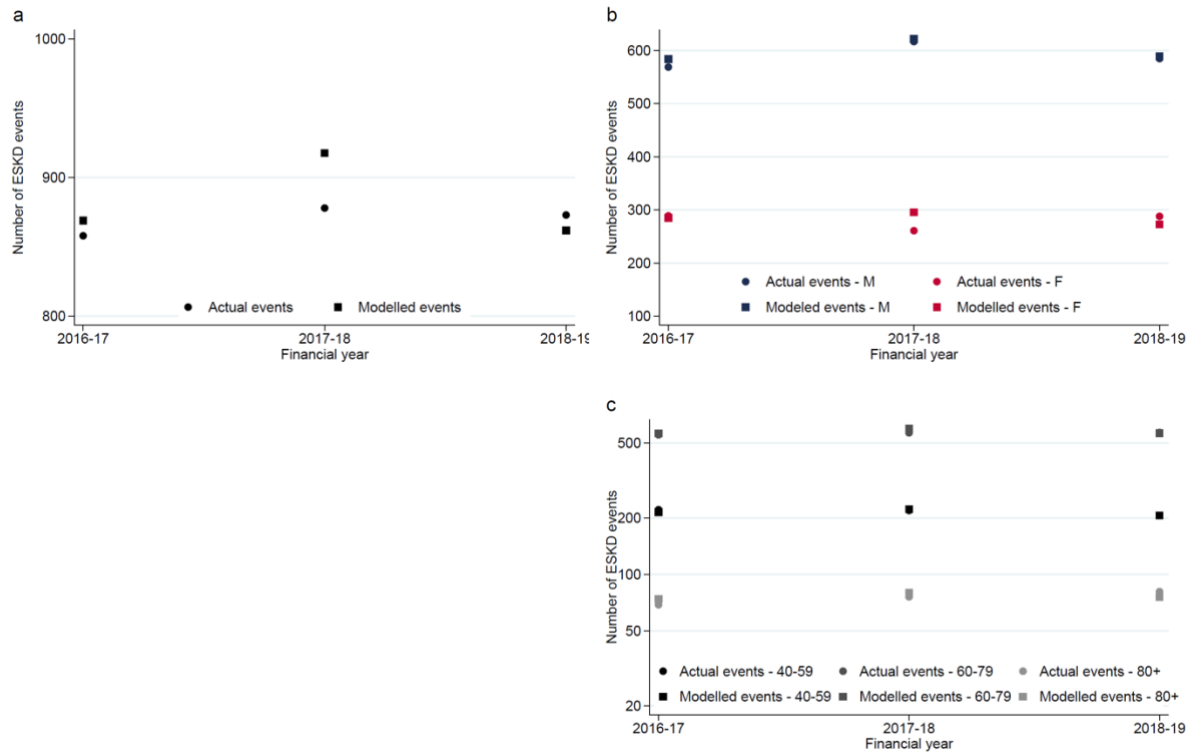



ESM Fig. 8 – Model validation test 1 – All-cause mortality. Figures show the actual vs. modelled number of deaths, overall (a), by sex (b), and age (c). See ESM Methods above for more details.

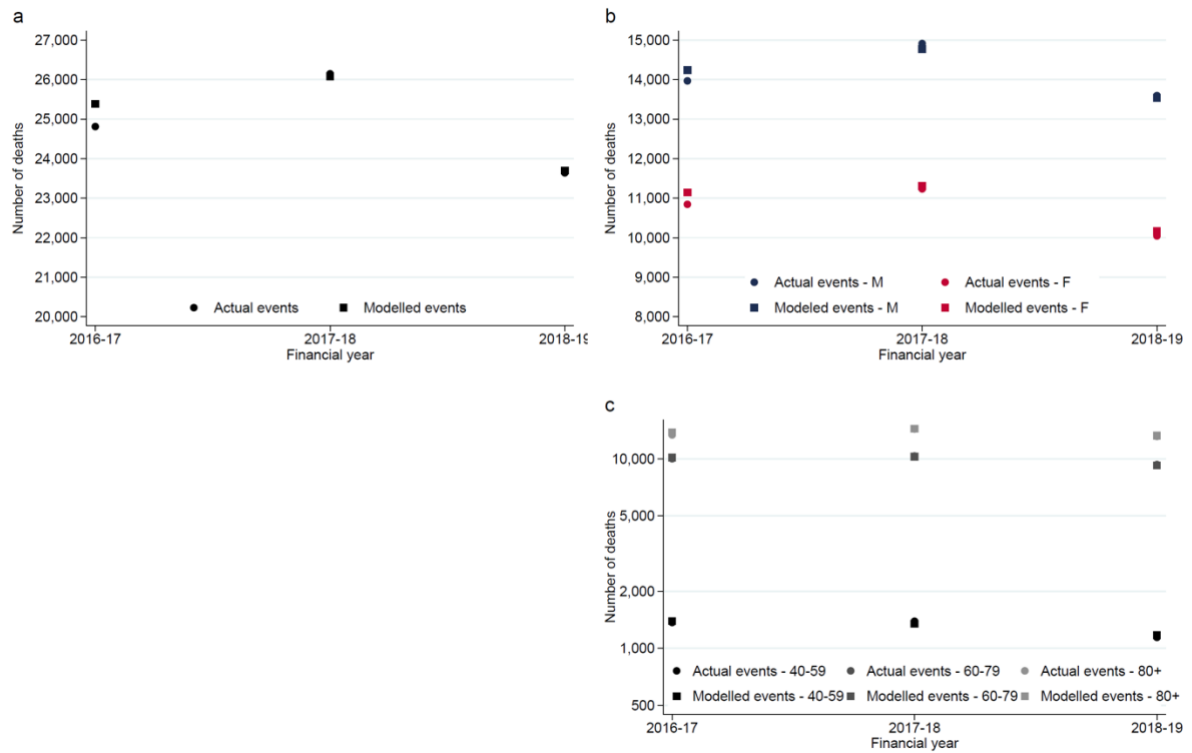

ESM Fig. 9 – Model validation test 2. Figures show the actual vs. modelled number myocardial infarctions (MIs; **a**) strokes (**b**), heart failure (HF) events (**c**), end-stage kidney disease (ESKD) events (**d**), and all-cause mortality events (**e**). See ESM Methods above for more details.

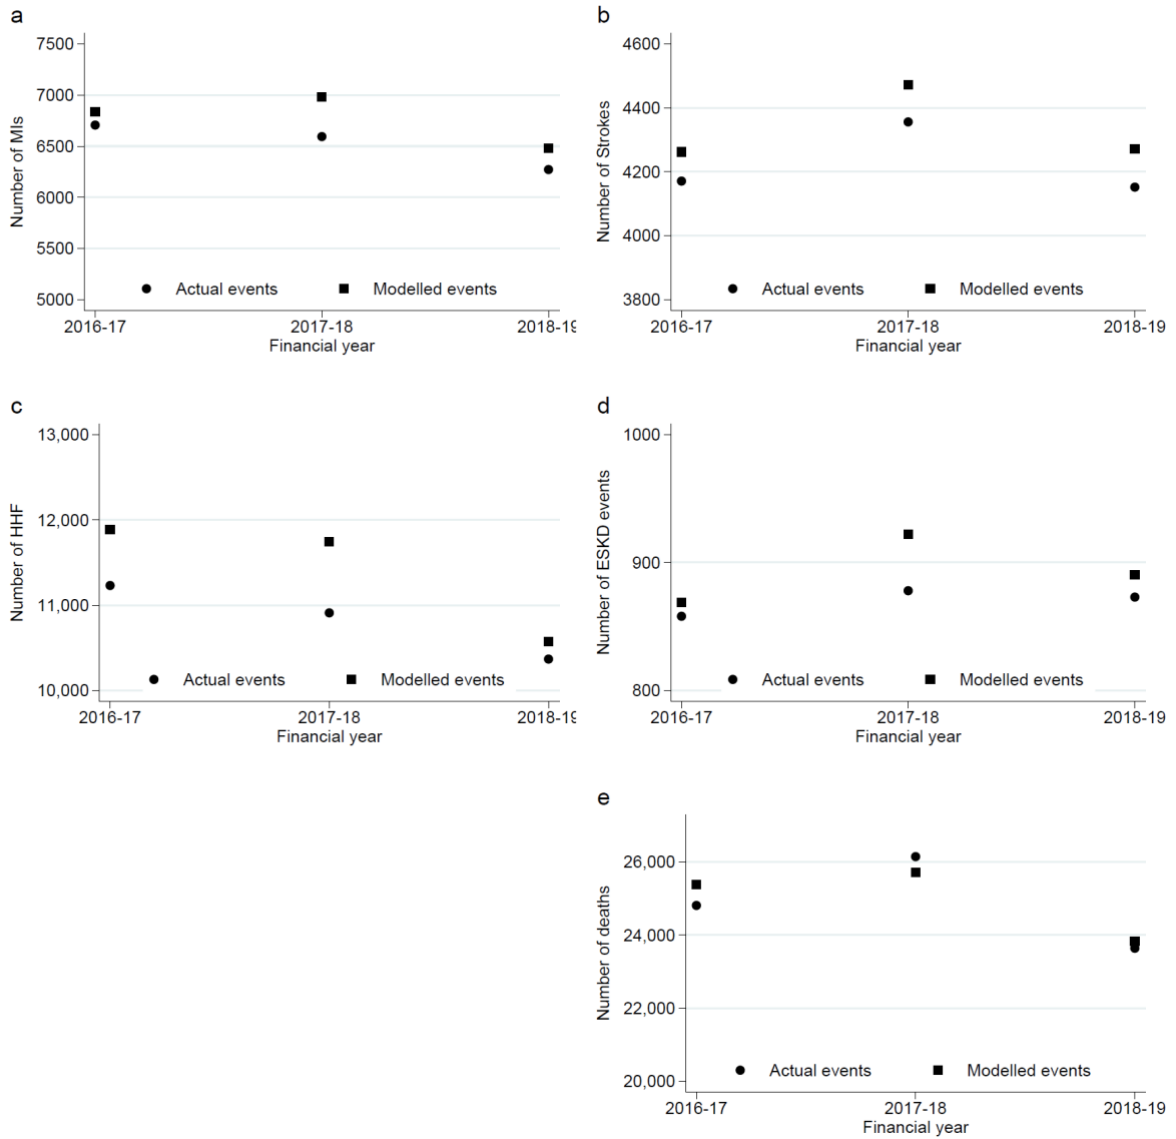

# CHEERS 2022 Checklist

| Topic                                                   | No. | Item                                                                                                                            | Location where item is reported |
|---------------------------------------------------------|-----|---------------------------------------------------------------------------------------------------------------------------------|---------------------------------|
| <b>Title</b>                                            |     |                                                                                                                                 |                                 |
|                                                         | 1   | Identify the study as an economic evaluation and specify the interventions being compared.                                      | 1                               |
| <b>Abstract</b>                                         |     |                                                                                                                                 |                                 |
|                                                         | 2   | Provide a structured summary that highlights context, key methods, results, and alternative analyses.                           | 2                               |
| <b>Introduction</b>                                     |     |                                                                                                                                 |                                 |
| <b>Background and objectives</b>                        | 3   | Give the context for the study, the study question, and its practical relevance for decision making in policy or practice.      | 3                               |
| <b>Methods</b>                                          |     |                                                                                                                                 |                                 |
| <b>Health economic analysis plan</b>                    | 4   | Indicate whether a health economic analysis plan was developed and where available.                                             | N/A                             |
| <b>Study population</b>                                 | 5   | Describe characteristics of the study population (such as age range, demographics, socioeconomic, or clinical characteristics). | Appendix - ESM Table 1          |
| <b>Setting and location</b>                             | 6   | Provide relevant contextual information that may influence findings.                                                            | 5, 6                            |
| <b>Comparators</b>                                      | 7   | Describe the interventions or strategies being compared and why chosen.                                                         | 3, 7                            |
| <b>Perspective</b>                                      | 8   | State the perspective(s) adopted by the study and why chosen.                                                                   | 4, 5                            |
| <b>Time horizon</b>                                     | 9   | State the time horizon for the study and why appropriate.                                                                       | 5                               |
| <b>Discount rate</b>                                    | 10  | Report the discount rate(s) and reason chosen.                                                                                  | 5                               |
| <b>Selection of outcomes</b>                            | 11  | Describe what outcomes were used as the measure(s) of benefit(s) and harm(s).                                                   | 6                               |
| <b>Measurement of outcomes</b>                          | 12  | Describe how outcomes used to capture benefit(s) and harm(s) were measured.                                                     | 6                               |
| <b>Valuation of outcomes</b>                            | 13  | Describe the population and methods used to measure and value outcomes.                                                         | 5, 6, Appendix                  |
| <b>Measurement and valuation of resources and costs</b> | 14  | Describe how costs were valued.                                                                                                 | Table 1                         |
| <b>Currency, price date, and conversion</b>             | 15  | Report the dates of the estimated resource quantities and unit costs, plus the currency and year of conversion.                 | Table 1                         |
| <b>Rationale and description of model</b>               | 16  | If modelling is used, describe in detail and why used. Report if the model is publicly available and where it can be accessed.  | 5                               |

| Topic                                                                        | No. | Item                                                                                                                                                                          | Location where item is reported |
|------------------------------------------------------------------------------|-----|-------------------------------------------------------------------------------------------------------------------------------------------------------------------------------|---------------------------------|
| <b>Analytics and assumptions</b>                                             | 17  | Describe any methods for analysing or statistically transforming data, any extrapolation methods, and approaches for validating any model used.                               | Appendix                        |
| <b>Characterising heterogeneity</b>                                          | 18  | Describe any methods used for estimating how the results of the study vary for subgroups.                                                                                     | 10                              |
| <b>Characterising distributional effects</b>                                 | 19  | Describe how impacts are distributed across different individuals or adjustments made to reflect priority populations.                                                        | N/A                             |
| <b>Characterising uncertainty</b>                                            | 20  | Describe methods to characterise any sources of uncertainty in the analysis.                                                                                                  | 7, 8                            |
| <b>Approach to engagement with patients and others affected by the study</b> | 21  | Describe any approaches to engage patients or service recipients, the general public, communities, or stakeholders (such as clinicians or payers) in the design of the study. | N/A                             |
| <b>Results</b>                                                               |     |                                                                                                                                                                               |                                 |
| <b>Study parameters</b>                                                      | 22  | Report all analytic inputs (such as values, ranges, references) including uncertainty or distributional assumptions.                                                          | Table 1                         |
| <b>Summary of main results</b>                                               | 23  | Report the mean values for the main categories of costs and outcomes of interest and summarise them in the most appropriate overall measure.                                  | Table 2                         |
| <b>Effect of uncertainty</b>                                                 | 24  | Describe how uncertainty about analytic judgments, inputs, or projections affect findings. Report the effect of choice of discount rate and time horizon, if applicable.      | Table 2, Fig. 2-4               |
| <b>Effect of engagement with patients and others affected by the study</b>   | 25  | Report on any difference patient/service recipient, general public, community, or stakeholder involvement made to the approach or findings of the study                       | N/A                             |
| <b>Discussion</b>                                                            |     |                                                                                                                                                                               |                                 |
| <b>Study findings, limitations, generalisability, and current knowledge</b>  | 26  | Report key findings, limitations, ethical or equity considerations not captured, and how these could affect patients, policy, or practice.                                    | 12-15                           |
| <b>Other relevant information</b>                                            |     |                                                                                                                                                                               |                                 |
| <b>Source of funding</b>                                                     | 27  | Describe how the study was funded and any role of the funder in the identification, design, conduct, and reporting of the analysis                                            | 16                              |
| <b>Conflicts of interest</b>                                                 | 28  | Report authors conflicts of interest according to journal or International Committee of Medical Journal Editors requirements.                                                 | 16                              |

*From:* Husereau D, Drummond M, Augustovski F, et al. Consolidated Health Economic Evaluation Reporting Standards 2022 (CHEERS 2022) Explanation and Elaboration: A Report of the ISPOR CHEERS II Good Practices Task Force. *Value Health* 2022;25. doi:10.1016/j.jval.2021.10.008
